# Supplementary material for: One-step synthesis of nonstoichiometric TiO2 nanorod films for enhanced photocatalytic H2 evolution
Source: Royal Society of Chemistry journal article supplement (doi:10.1039/c8dt00066b), 2018-01-01
Supplement: c8dt00066b1.pdf [file c8dt00066b1.pdf]

## Supplementary Information

### One-step synthesis of nonstoichiometric TiO<sub>2</sub> nanorods films for enhanced photocatalytic H<sub>2</sub> evolution

Qianqian Hu,<sup>a, b</sup> Jianrong Li,<sup>b</sup> Qiaohong Li,<sup>b</sup> Wang Guo,<sup>a</sup> Jiquan Huang<sup>a, \*</sup> and Xiaoying Huang<sup>b, \*</sup>

<sup>a</sup> Key Laboratory of Optoelectronic Materials Chemistry and Physics, Fujian Institute of Research on the Structure of Matter, Chinese Academy of Sciences, Fuzhou 350002, China

<sup>b</sup> State Key Laboratory of Structural Chemistry, Fujian Institute of Research on the Structure of Matter, Chinese Academy of Sciences, Fuzhou, Fujian 350002, China

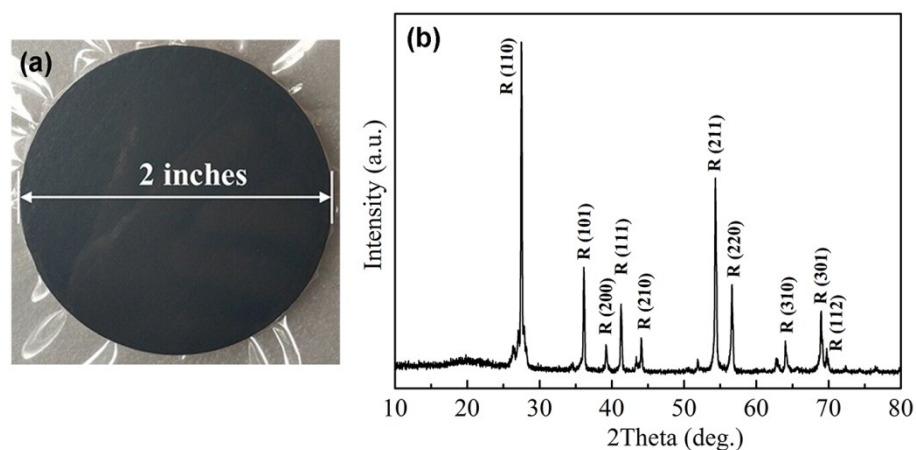

Fig. S1 Photograph (a) and XRD (b) spectrum of the TiO<sub>2</sub> ceramic plate.

---

\* Corresponding author.  
Tel: +86-591-63179098; Fax: +86-591-83721039.  
Email: hjq@fjirsm.ac.cn

Tel: +86-591-63173145; Fax: +86-591-63173145.  
Email: xyhuang@fjirsm.ac.cn

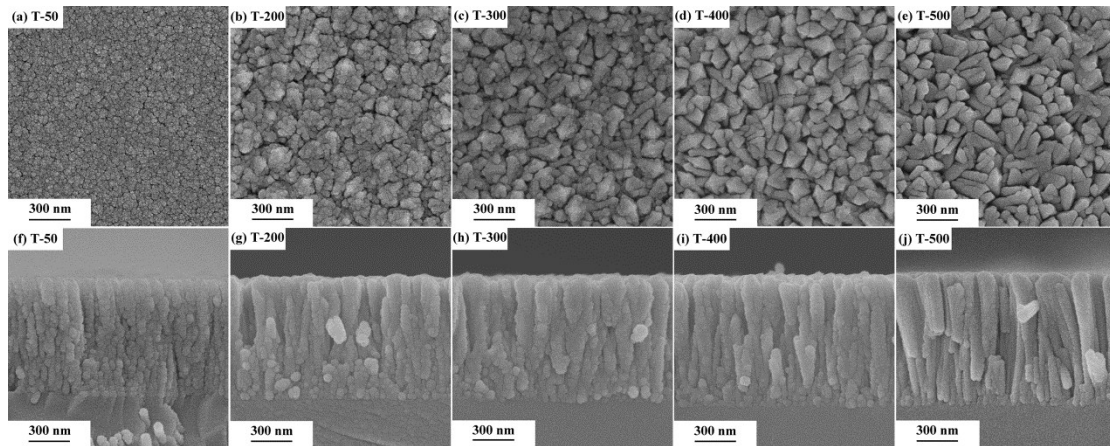

**Fig. S2** SEM images of annealed TiO<sub>2</sub> films, (a-e) top-down view, (f-j) cross-section images.

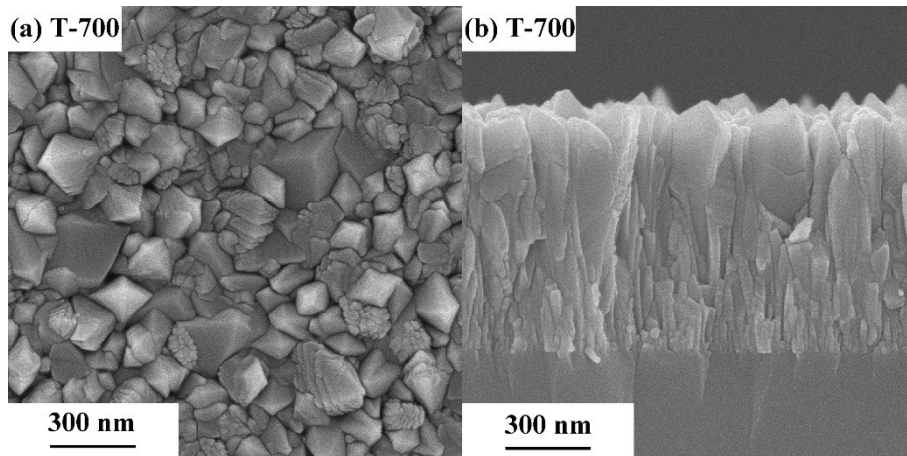

**Fig. S3** SEM images of TiO<sub>2</sub> films deposited at 700 °C, (a) top-down view, (b) cross-section images.

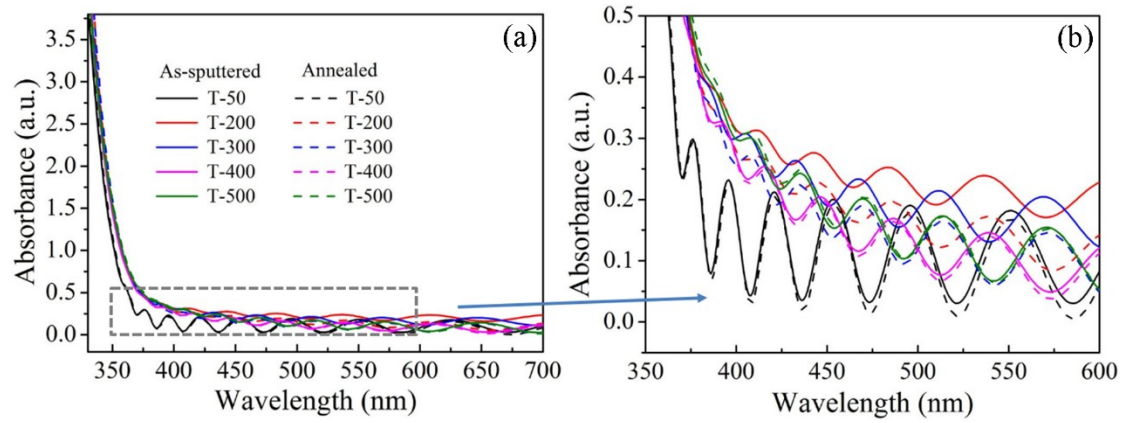

**Fig. S4** (a) Comparison diagram of UV-visible absorption spectra over the TiO<sub>2</sub> films before and after annealing, (b) is taken from the dotted box in (a).

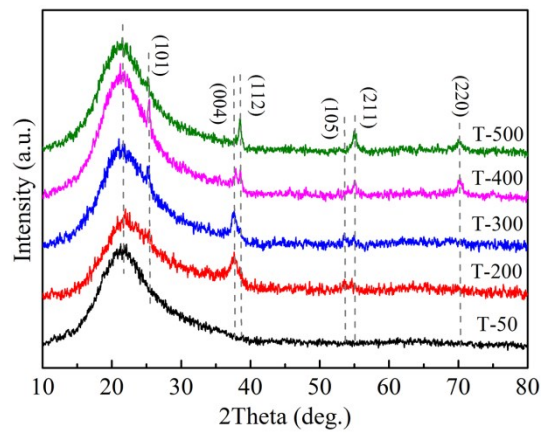

**Fig. S5** XRD spectra of as-sputtered samples after photocatalytic reactions.
